# Supplementary material for: VolcanoFinder: Genomic scans for adaptive introgression
Source: PubMed Central journal article supplement (PMC7326285; doi:10.1371/journal.pgen.1008867), 2020-06-18
Supplement: pgen.1008867.s004.pdf [file pgen.1008867.s004.pdf]

# VolcanoFinder

genomic scans for adaptive introgression

## S4 Power Analysis - 10 Mb Chromosome

Derek Setter<sup>123</sup><sup>✉</sup><sup>☐</sup>, Sylvain Mousset<sup>1</sup><sup>✉</sup>, Xiaoheng Cheng<sup>4</sup>, Rasmus Nielsen<sup>5</sup>, Michael DeGiorgio<sup>6</sup><sup>‡</sup>, Joachim Hermisson<sup>127</sup><sup>‡</sup>,

**1** Department of Mathematics, University of Vienna, Vienna, Austria

**2** Vienna Graduate School of Population Genetics, Vienna, Austria

**3** School of Biological Sciences, University of Edinburgh, Edinburgh, United Kingdom

**4** Huck Institutes of the Life Sciences, Pennsylvania State University, University Park, PA, USA

**5** Departments of Integrative Biology and Statistics, University of California, Berkeley, CA, USA

**6** Department of Computer and Electrical Engineering and Computer Science, Florida Atlantic University, Boca Raton, FL, USA

**7** Max F. Perutz Laboratories, University of Vienna, Vienna, Austria

<sup>✉</sup>These authors contributed equally to this work.

<sup>‡</sup>These authors also contributed equally to this work.

<sup>☐</sup>Current Address: School of Biological Sciences, University of Edinburgh, Edinburgh, United Kingdom

\*Correspondence: joachim.hermisson@univie.ac.at (JH), mdegorg@fau.edu (MD)

## S4 Human Data

Table D1

Candidate peaks ranked by the maximum log likelihood ratios in the VolcanoFinder scan of the European (CEU) sample.

| Chr. | Peak Position | L.R.  | $-\log_{10} \hat{\alpha}$ | $\hat{D}$ | Nearest Gene(s)                                                                   | RefSeq ID                                                       |
|------|---------------|-------|---------------------------|-----------|-----------------------------------------------------------------------------------|-----------------------------------------------------------------|
| 22   | 36556023      | 102.4 | 3.42                      | 0.0038    | <i>APOL3</i> , <i>APOL4</i>                                                       | NM_145640.2, NM_030643.4                                        |
| 8    | 42558168      | 80.4  | 3.67                      | 0.0023    | <i>CHRNA3</i> , <i>CHRNA6</i>                                                     | NM_001347717.1, NM_004198.3                                     |
| 2    | 223953190     | 55.5  | 3.21                      | 0.0061    | <i>KCNE4</i>                                                                      | NM_080671.3                                                     |
| 14   | 81512174      | 51.5  | 3.73                      | 0.0023    | <i>TSHR</i>                                                                       | NM_001018036.2                                                  |
| 21   | 19243059      | 50.5  | 3.68                      | 0.0015    | <i>CHODL</i> , <i>CHODL-AS1</i>                                                   | NM_001204177.1, NR_024354.1                                     |
| 2    | 24626190      | 36.9  | 3.88                      | 0.0015    | <i>ITSN2</i>                                                                      | NM_001348181.1                                                  |
| 2    | 223924190     | 36.7  | 3.58                      | 0.0030    | <i>KCNE4</i>                                                                      | NM_080671.3                                                     |
| 3    | 182989072     | 35.4  | 3.48                      | 0.0023    | <i>MCF2L2</i> , <i>B3GNT5</i>                                                     | NM_015078.3, NM_032047.4                                        |
| 2    | 122044190     | 35.2  | 3.50                      | 0.0015    | <i>TFCP2L1</i>                                                                    | NM_014553.2                                                     |
| 2    | 172059190     | 33.7  | 3.49                      | 0.0023    | <i>TLK1</i>                                                                       | NM_012290.4                                                     |
| 7    | 73935618      | 32.8  | 3.31                      | 0.0030    | <i>GTF2IRD1</i>                                                                   | NM_005685.3                                                     |
| 2    | 12035190      | 29.6  | 3.35                      | 0.0023    | –                                                                                 | –                                                               |
| 16   | 83231010      | 29.5  | 3.19                      | 0.0015    | <i>CDH13</i>                                                                      | NM_001220491.1                                                  |
| 3    | 127624072     | 29.2  | 3.49                      | 0.0023    | <i>KBTBD12</i>                                                                    | NM_207335.2                                                     |
| 11   | 44436084      | 29.0  | 3.30                      | 0.0015    | –                                                                                 | –                                                               |
| 12   | 71969102      | 28.5  | 3.12                      | 0.0038    | <i>LGR5</i> , <i>ZFC3H1</i>                                                       | NM_001277227.1, NM_144982.4                                     |
| 19   | 17289015      | 27.9  | 3.20                      | 0.0023    | <i>MYO9B</i> , <i>USE1</i> , <i>OCEL1</i>                                         | NM_004145.3, NM_018467.3, NM_024578.2                           |
| 20   | 7596076       | 27.8  | 3.32                      | 0.0023    | –                                                                                 | –                                                               |
| 10   | 28705072      | 27.4  | 3.47                      | 0.0015    | –                                                                                 | –                                                               |
| 1    | 232398053     | 26.5  | 3.50                      | 0.0015    | –                                                                                 | –                                                               |
| 3    | 129080072     | 25.6  | 3.22                      | 0.0023    | <i>RPL32P3</i> , <i>HIFX</i> , <i>HIFX-AS1</i> , <i>SNORA7B</i> , <i>EF-CAB12</i> | NR_003111.2, NR_026991.1, NR_006026.3, NR_002992.2, NM_207307.2 |
| 5    | 154678042     | 24.6  | 3.50                      | 0.0015    | –                                                                                 | –                                                               |
| 13   | 105399042     | 24.4  | 3.28                      | 0.0030    | –                                                                                 | –                                                               |
| 9    | 115694060     | 24.4  | 3.29                      | 0.0015    | <i>SLC46A2</i>                                                                    | NM_033051.3                                                     |
| 6    | 29035112      | 23.9  | 3.12                      | 0.0023    | <i>LOC100129636</i> , <i>OR2W1</i> , <i>OR2B3</i> , <i>OR2J3</i>                  | NR_125387.1, NM_030903.3, NM_001005226.2, NM_001005216.3        |
| 9    | 79675060      | 23.9  | 3.27                      | 0.0015    | <i>FOXB2</i>                                                                      | NM_001013735.1                                                  |
| 6    | 34052112      | 23.2  | 3.29                      | 0.0023    | <i>GRM4</i>                                                                       | NM_000841.3                                                     |

Table D2

Candidate peaks ranked by the maximum log likelihood ratios in the VolcanoFinder scan of the Yoruban (YRI) sample.

| Chr. | Peak Position | LR   | $-\log_{10} \hat{\alpha}$ | $\hat{D}$ | Nearest Gene(s)                                                    | Respective RefSeq ID                                             |
|------|---------------|------|---------------------------|-----------|--------------------------------------------------------------------|------------------------------------------------------------------|
| 19   | 41 473 015    | 45.2 | 3.49                      | 0.0020    | <i>CYP2B7P</i> , <i>CYP2B6</i>                                     | NR_001278.1, NML_000767.4                                        |
| 1    | 152 102 007   | 37.3 | 3.48                      | 0.0030    | <i>LOC100131107</i> , <i>TCHHL1</i> ,<br><i>TCHH</i> , <i>RPTN</i> | NM_001310142.1, NML_001008536.1,<br>NM_007113.3, NML_001122965.1 |
| 12   | 59 033 128    | 32.1 | 3.56                      | 0.0020    | <i>LOC101927653</i> ,<br><i>LOC100506869</i>                       | NR_120452.1, NR_126341.1                                         |
| 3    | 33 007 016    | 32.0 | 3.48                      | 0.0030    | <i>CCR4</i> , <i>GLB1</i>                                          | NM_005508.4, NML_001079811.2                                     |
| 2    | 170 442 117   | 28.7 | 3.25                      | 0.0020    | <i>FASTKD1</i> , <i>PIIG</i>                                       | NM_001322046.1, NML_004792.2                                     |
| 2    | 235 174 117   | 25.1 | 3.09                      | 0.0020    | –                                                                  | –                                                                |
| 4    | 101 771 036   | 22.9 | 3.53                      | 0.0020    | –                                                                  | –                                                                |
| 4    | 78 105 036    | 22.2 | 3.31                      | 0.0030    | <i>CCNG2</i>                                                       | NM_004354.2                                                      |

Fig. D1

Whole-genome Manhattan plot of the maximum likelihood ratio test statistic for the European (CEU) population computed from Model 1 of VolcanoFinder on data on within-CEU polymorphism and substitutions with respect to chimpanzee, and annotated with the top 18 gene candidates.

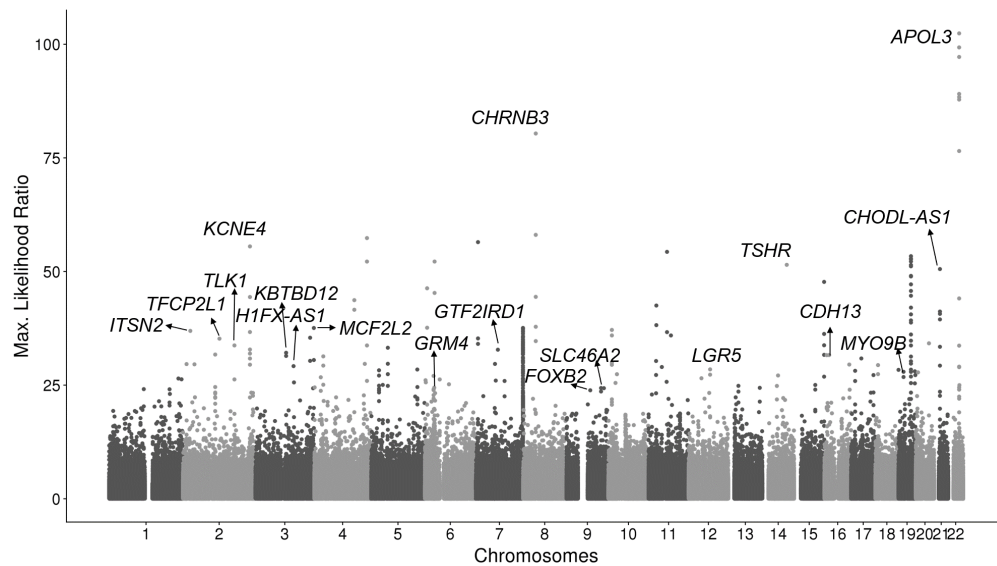

Fig. D2

Whole-genome Manhattan plot of the maximum likelihood ratio test statistic for the Yoruban (YRI) population computed from Model 1 of VolcanoFinder on data on within-YRI polymorphism and substitutions with respect to chimpanzee, and annotated with the top 7 gene candidates.

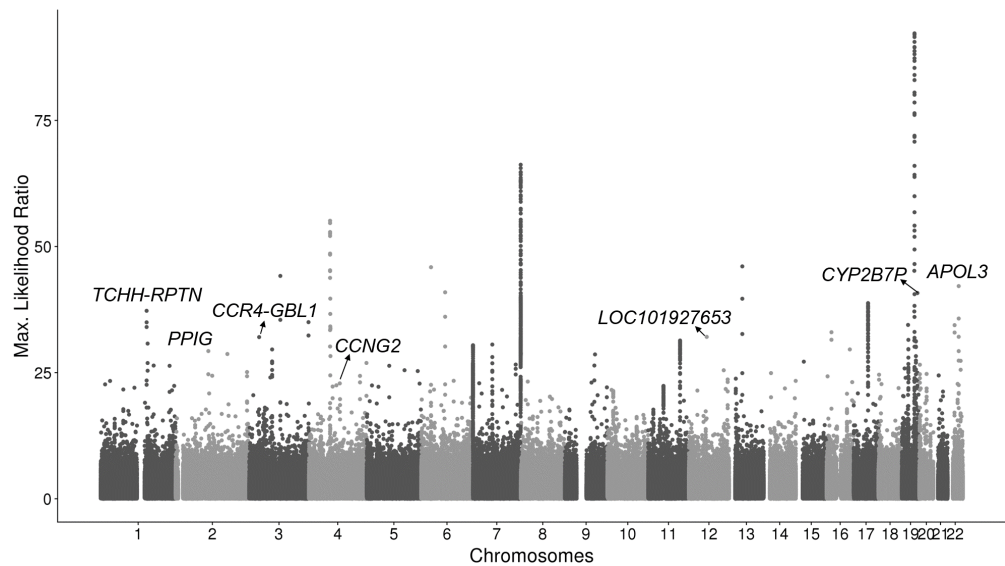

Fig. D3

**Introgression sweep signals, parameter estimates, and sequencing properties across the 100 kb region on chromosome 22 covering *APOL* gene cluster in YRI.**

**A.** Likelihood ratio test statistic computed from Model 1 of VolcanoFinder on data on within-YRI polymorphism and substitutions with respect to chimpanzee. Horizontal dark gray, medium gray, and light gray bars correspond to regions that were filtered based on Hardy-Weinberg equilibrium (HWE) test. Gene tracts and labels for key genes are depicted below the plot, with the wider bars representing exons. **B.** Values for  $\alpha$  and divergence  $D$  corresponding to the maximum likelihood estimate of the data. Black line corresponds to  $-\ln(\alpha)$  and vertical gray bars correspond to estimated  $D$ . **C.** Likelihood ratio test statistic computed from  $T_2$  of BALLET on data on within-YRI polymorphism and substitutions with respect to chimpanzee using windows of 100 (black) or 22 (gray) informative sites on either side of the test site. **D.** Mean pairwise sequence difference ( $\hat{\theta}_\pi$ ) computed in five kb windows centered on each polymorphic site. **E.** Mappability uniqueness scores for 35 nucleotide sequences across the region. **F.** Mean sequencing depth across the 108 YRI individuals as a function of genomic position, with the gray ribbon indicating standard deviation. The background heatmap displays the number of individuals devoid of sequencing reads as a function of genomic position, with darker shades of red indicating a greater number of individuals with no sequencing reads.

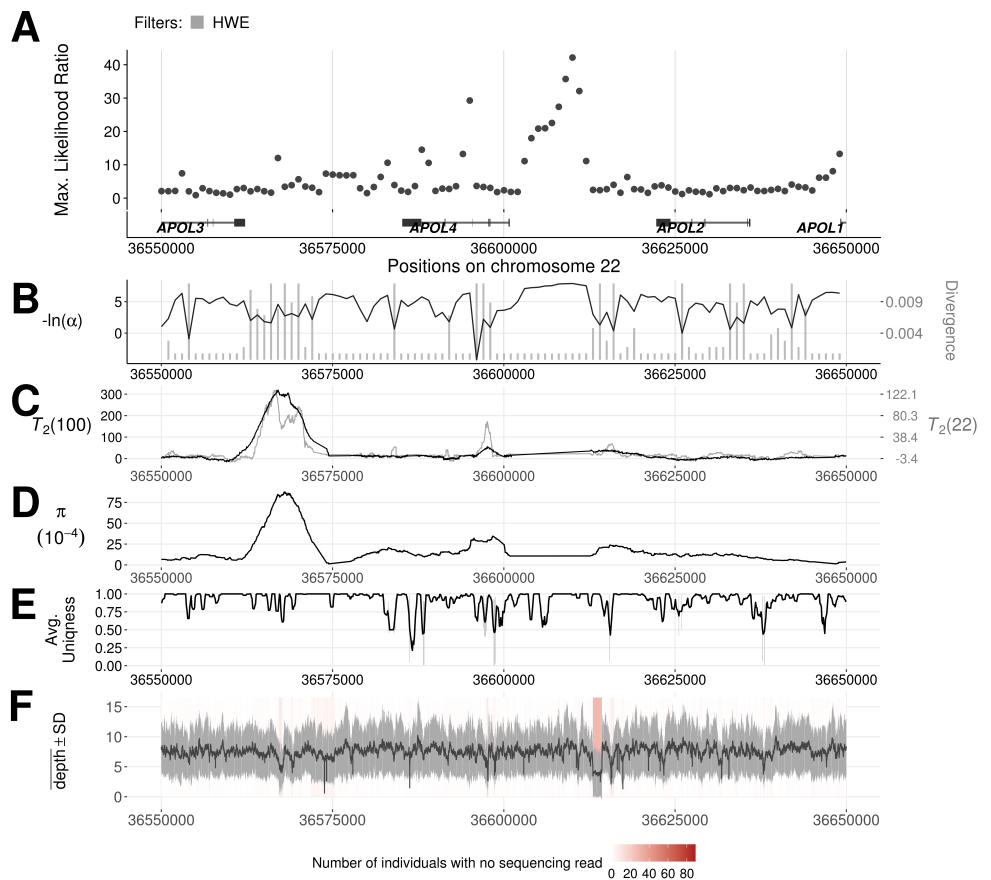

Fig. D4

**Introgression sweep signals, parameter estimates, and sequencing properties across the 100 kb region on chromosome 22 covering *APOL4* gene in CEU, matching the same region in YRI.**

**A.** Likelihood ratio test statistic computed from Model 1 of VolcanoFinder on data on within-CEU polymorphism and substitutions with respect to chimpanzee. Horizontal dark gray, medium gray, and light gray bars correspond to regions that were filtered based on Hardy-Weinberg equilibrium (HWE) test. Gene tracts and labels for key genes are depicted below the plot, with the wider bars representing exons. **B.** Values for  $\alpha$  and divergence  $D$  corresponding to the maximum likelihood estimate of the data. Black line corresponds to  $-\ln(\alpha)$  and vertical gray bars correspond to estimated  $D$ . **C.** Likelihood ratio test statistic computed from  $T_2$  of BALLET on data on within-CEU polymorphism and substitutions with respect to chimpanzee using windows of 100 (black) or 22 (gray) informative sites on either side of the test site. **D.** Mean pairwise sequence difference ( $\hat{\theta}_\pi$ ) computed in five kb windows centered on each polymorphic site. **E.** Mappability uniqueness scores for 35 nucleotide sequences across the region. **F.** Mean sequencing depth across the 108 YRI individuals as a function of genomic position, with the gray ribbon indicating standard deviation. The background heatmap displays the number of individuals devoid of sequencing reads as a function of genomic position, with darker shades of red indicating a greater number of individuals with no sequencing reads.

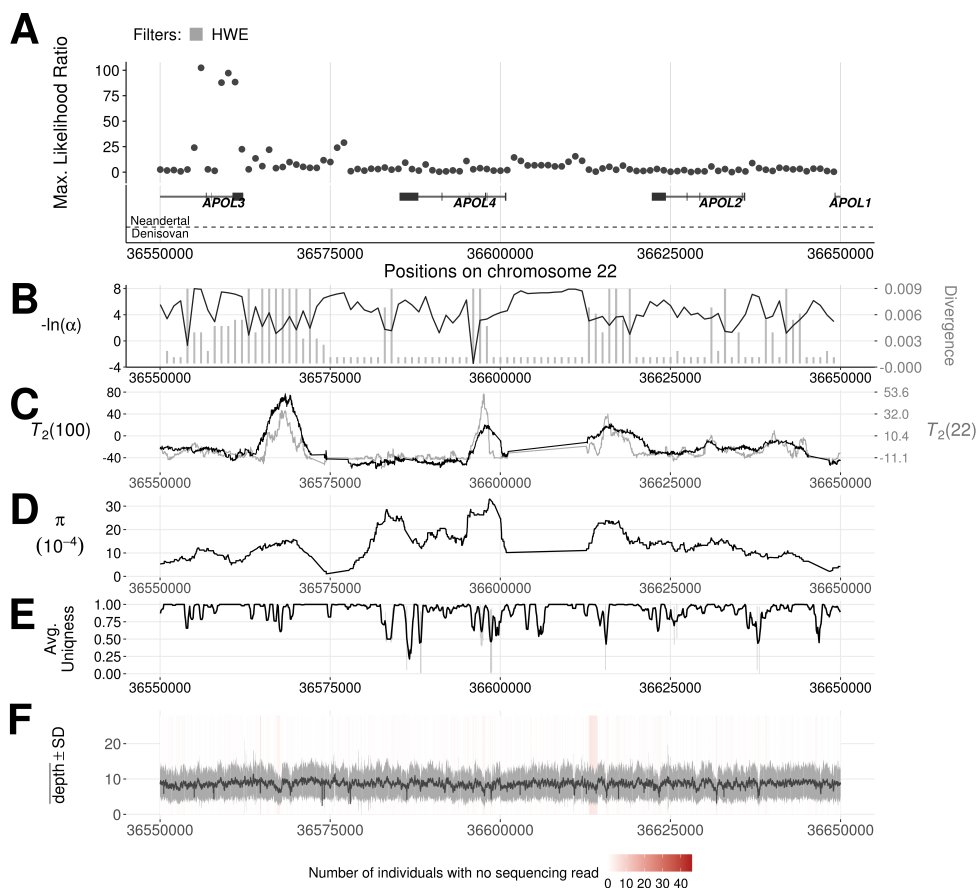

Fig. D5

**Introgression sweep signals, parameter estimates, and sequencing properties across the one Mb region on chromosome 7 covering the *PTPRN2* gene region in YRI.**

**A.** Likelihood ratio test statistic computed from Model 1 of VolcanoFinder on data on within-YRI polymorphism and substitutions with respect to chimpanzee. Horizontal dark gray and light gray bars correspond to regions that were filtered based on either mean CRG score or mean CRG score and proximity to a telomere, respectively. Gene tracts and labels for key genes are depicted below the plot, with the wider bars representing exons. **B.** Values for  $\alpha$  and divergence  $D$  corresponding to the maximum likelihood estimate of the data. Black line corresponds to  $-\ln(\alpha)$  and vertical gray bars correspond to estimated  $D$ . **C.** Likelihood ratio test statistic computed from  $T_2$  of BALET on data on within-YRI polymorphism and substitutions with respect to chimpanzee using windows of 100 (black) or 22 (gray) informative sites on either side of the test site. **D.** Mean pairwise sequence difference ( $\hat{\theta}_\pi$ ) computed in five kb windows centered on each polymorphic site. **E.** Mappability uniqueness scores for 35 nucleotide sequences across the region. **F.** Mean sequencing depth across the 108 YRI individuals as a function of genomic position, with the gray ribbon indicating standard deviation. The background heatmap displays the number of individuals devoid of sequencing reads as a function of genomic position, with darker shades of red indicating a greater number of individuals with no sequencing reads.

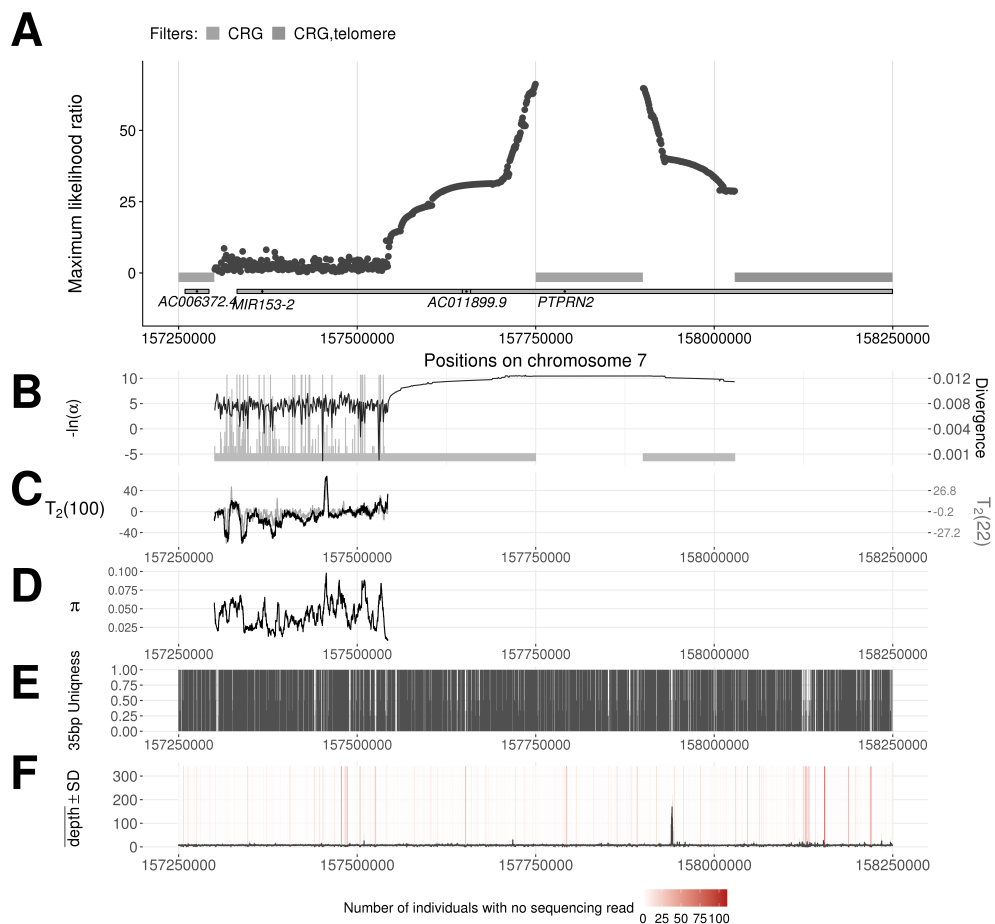



Fig. D6

**Introgression sweep signals, parameter estimates, and sequencing properties across the one Mb region on chromosome 19 covering region surrounding *PCAT19* and *CEACAM4* genes in YRI.**

**A.** Likelihood ratio test statistic computed from Model 1 of VolcanoFinder on data on within-YRI polymorphism and substitutions with respect to chimpanzee. Horizontal dark gray and light gray bars correspond to regions that were filtered based on Hardy-Weinberg equilibrium (HWE) test. Gene tracts and labels for key genes are depicted below the plot, with the wider bars representing exons. **B.** Values for  $\alpha$  and divergence  $D$  corresponding to the maximum likelihood estimate of the data. Black line corresponds to  $-\ln(\alpha)$  and vertical gray bars correspond to estimated  $D$ . **C.** Likelihood ratio test statistic computed from  $T_2$  of BALLET on data on within-YRI polymorphism and substitutions with respect to chimpanzee using windows of 100 (black) or 22 (gray) informative sites on either side of the test site. **D.** Mean pairwise sequence difference ( $\hat{\theta}_\pi$ ) computed in five kb windows centered on each polymorphic site. **E.** Mappability uniqueness scores for 35 nucleotide sequences across the region. **F.** Mean sequencing depth across the 108 YRI individuals as a function of genomic position, with the gray ribbon indicating standard deviation. The background heatmap displays the number of individuals devoid of sequencing reads as a function of genomic position, with darker shades of red indicating a greater number of individuals with no sequencing reads.

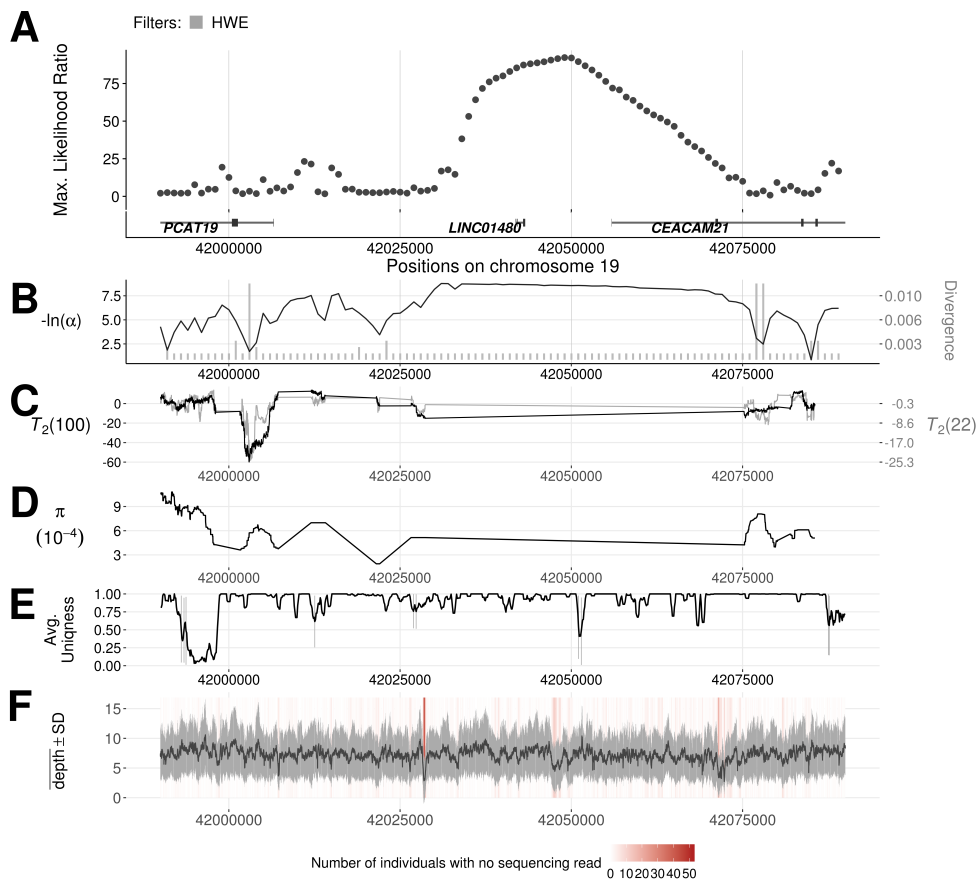

Fig. D7

**Introgression sweep signals, parameter estimates, and sequencing properties across the one Mb region on chromosome 17 covering *IGFBP1* and *B4GALNT2* in YRI.**

**A.** Likelihood ratio test statistic computed from Model 1 of VolcanoFinder on data on within-YRI polymorphism and substitutions with respect to chimpanzee. Horizontal dark gray and light gray bars correspond to regions that were filtered based on Hardy-Weinberg equilibrium (HWE) test. Gene tracts and labels for key genes are depicted below the plot, with wider bars representing exons. **B.** Values for  $\alpha$  and divergence  $D$  corresponding to the maximum likelihood estimate of the data. Black line corresponds to  $-\ln(\alpha)$  and vertical gray bars correspond to estimated  $D$ . **C.** Likelihood ratio test statistic computed from  $T_2$  of BALLET on data on within-YRI polymorphism and substitutions with respect to chimpanzee using windows of 100 (black) or 22 (gray) informative sites on either side of the test site. **D.** Mean pairwise sequence difference ( $\hat{\theta}_\pi$ ) computed in five kb windows centered on each polymorphic site. **E.** Mappability uniqueness scores for 35 nucleotide sequences across the region. **F.** Mean sequencing depth across the 108 YRI individuals as a function of genomic position, with the gray ribbon indicating standard deviation. The background heatmap displays the number of individuals devoid of sequencing reads as a function of genomic position, with darker shades of red indicating a greater number of individuals with no sequencing reads.

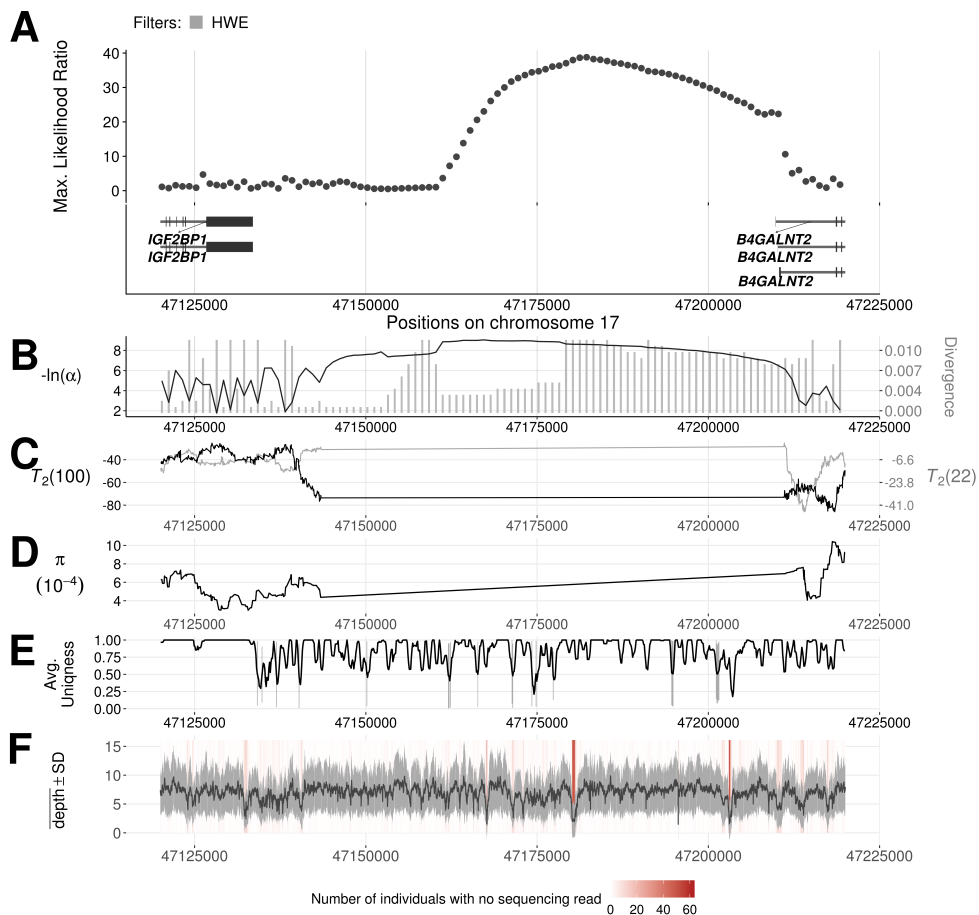

Fig. D8

**Introgression sweep signals, parameter estimates, and sequencing properties across the 100 kb region on chromosome 19 covering the gene *MUC4* in CEU.**

**A.** Likelihood ratio statistic computed from Model 1 of VolcanoFinder on the data of within-CEU polymorphism and substitutions with respect to the chimpanzee. Gray bars immediately below indicate the type of filters, and the longest gene transcripts are depicted with thick bars standing for exons. **B.** Values for  $\alpha$  and divergence  $D$  corresponding to the maximum likelihood estimate of the data. Black line corresponds to  $-\ln(\alpha)$  and vertical gray bars correspond to estimated  $D$ . **C.** Likelihood ratio test statistic computed from  $T_2$  of BALLEET on data on within-CEU polymorphism and substitutions with respect to chimpanzee using windows of 100 (black) or 22 (gray) informative sites on either side of the test site. **D.** Mean pairwise sequence difference ( $\hat{\theta}_\pi$ ) computed in five kb windows centered on each polymorphic site. **E.** Mappability uniqueness scores for 35 nucleotide sequences across the region. **F.** Mean sequencing depth across the 99 CEU individuals as a function of genomic position, with the gray ribbon indicating standard deviation. The background heatmap displays the number of individuals devoid of sequencing reads as a function of genomic position, with darker shades of red indicating a greater number of individuals with no sequencing reads.

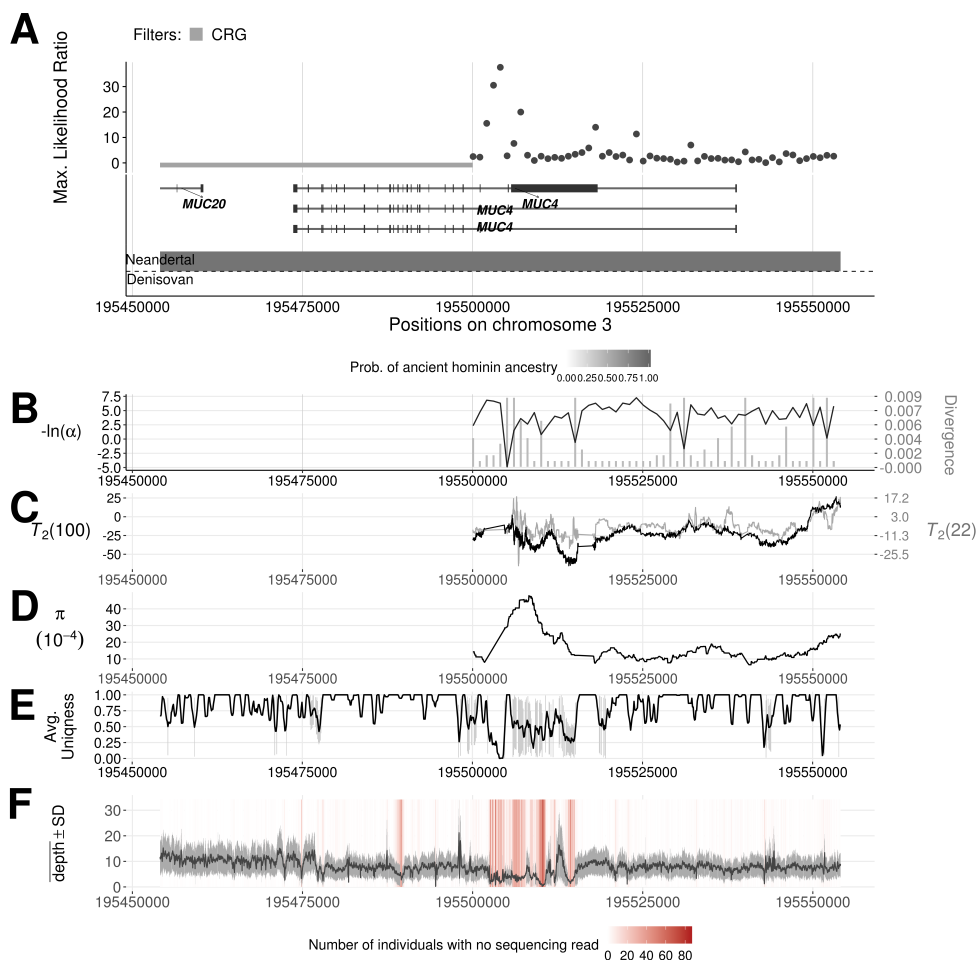

Fig. D9

**Introgression sweep signals, parameter estimates, and sequencing properties across the 100 kb region on chromosome 19 covering the gene *CYP2B6* and *CYP2B7* in YRI.**

**A.** Likelihood ratio statistic computed from Model 1 of VolcanoFinder on the data of within-YRI polymorphism and substitutions with respect to the chimpanzee. Gray bars immediately below indicate the type of filters, and the longest gene transcripts are depicted with the wider bars standing for exons. **B.** Values for  $\alpha$  and divergence  $D$  corresponding to the maximum likelihood estimate of the data. Black line corresponds to  $-\ln(\alpha)$  and vertical gray bars correspond to estimated  $D$ . **C.** Likelihood ratio test statistic computed from  $T_2$  of BALLET on data on within-YRI polymorphism and substitutions with respect to chimpanzee using windows of 100 (black) or 22 (gray) informative sites on either side of the test site. **D.** Mean pairwise sequence difference ( $\hat{\theta}_\pi$ ) computed in five kb windows centered on each polymorphic site. **E.** Mappability uniqueness scores for 35 nucleotide sequences across the region. **F.** Mean sequencing depth across the 108 YRI individuals as a function of genomic position, with the gray ribbon indicating standard deviation. The background heatmap displays the number of individuals devoid of sequencing reads as a function of genomic position, with darker shades of red indicating a greater number of individuals with no sequencing reads.

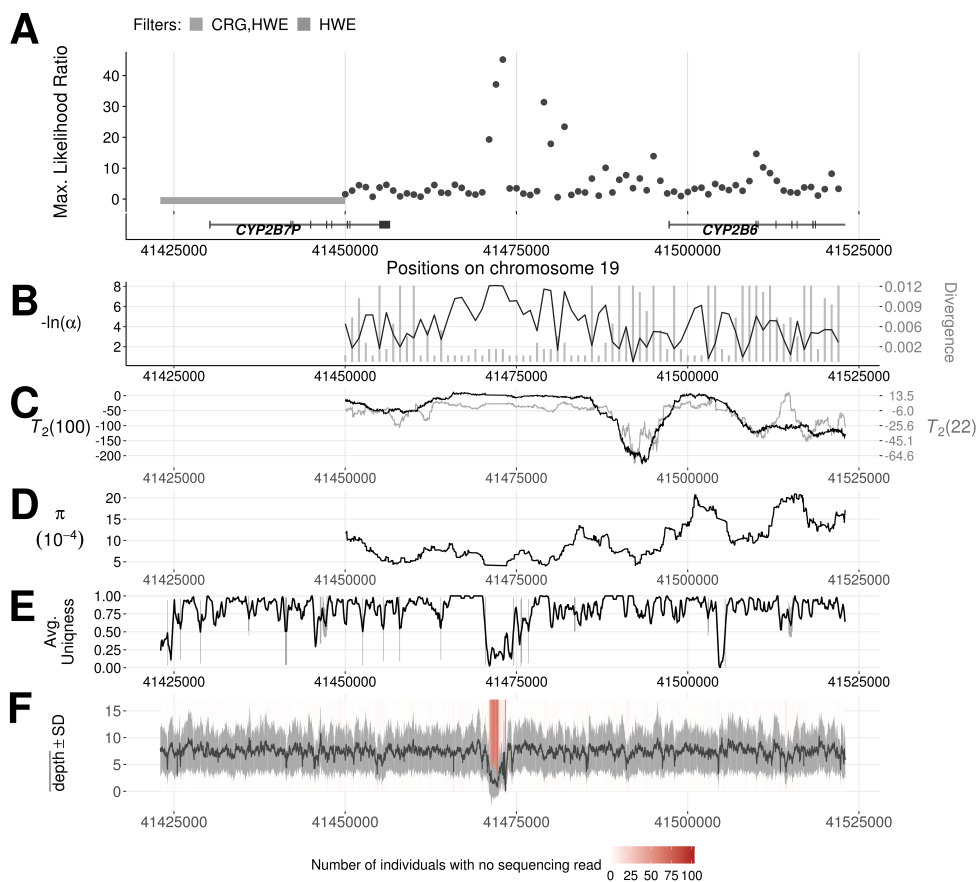

Fig. D10

194

**Evidence for adaptive introgression on the one Mb genomic region covering gene *BNC2* in CEU.**

195

196

197

198

199

200

201

202

203

204

205

206

207

208

209

210

211

212

213

214

215

216

**A.** Likelihood ratio test statistic computed from Model 1 of VolcanoFinder on data on within-CEU polymorphism and substitutions with respect to chimpanzee. Horizontal light gray bars correspond to regions that were filtered based on mean CRG and Hardy-Weinberg equilibrium (HWE) test. Gene tracts and labels for key genes are depicted below the plot, with the wider bars representing exons. Tracks of putative regions with Neanderthal (above the horizontal line) or Denisovan (below the horizontal line) ancestry are located below gene diagrams. Higher probabilities of Neanderthal or Denisovan ancestry are depicted with darker colored bands (data from [1]). Non-synonymous mutations with Neanderthal are indicated in red. **B.** Values for  $\alpha$  and divergence  $D$  corresponding to the maximum likelihood estimate of the data. Black line corresponds to  $-\ln(\alpha)$  and vertical gray bars correspond to estimated  $D$ . **C.** Likelihood ratio test statistic computed from  $T_2$  of BALLET on data on within-CEU polymorphism and substitutions with respect to chimpanzee using windows of 100 (black) or 22 (gray) informative sites on either side of the test site. **D.** Mean pairwise sequence difference ( $\hat{\theta}_\pi$ ) computed in five kb windows centered on each polymorphic site. **E.** Mappability uniqueness scores for 35 nucleotide sequences across the region. **F.** Mean sequencing depth across the 99 CEU individuals as a function of genomic position, with the gray ribbon indicating standard deviation. The background heatmap displays the number of individuals devoid of sequencing reads as a function of genomic position, with darker shades of red indicating a greater number of individuals with no sequencing reads.

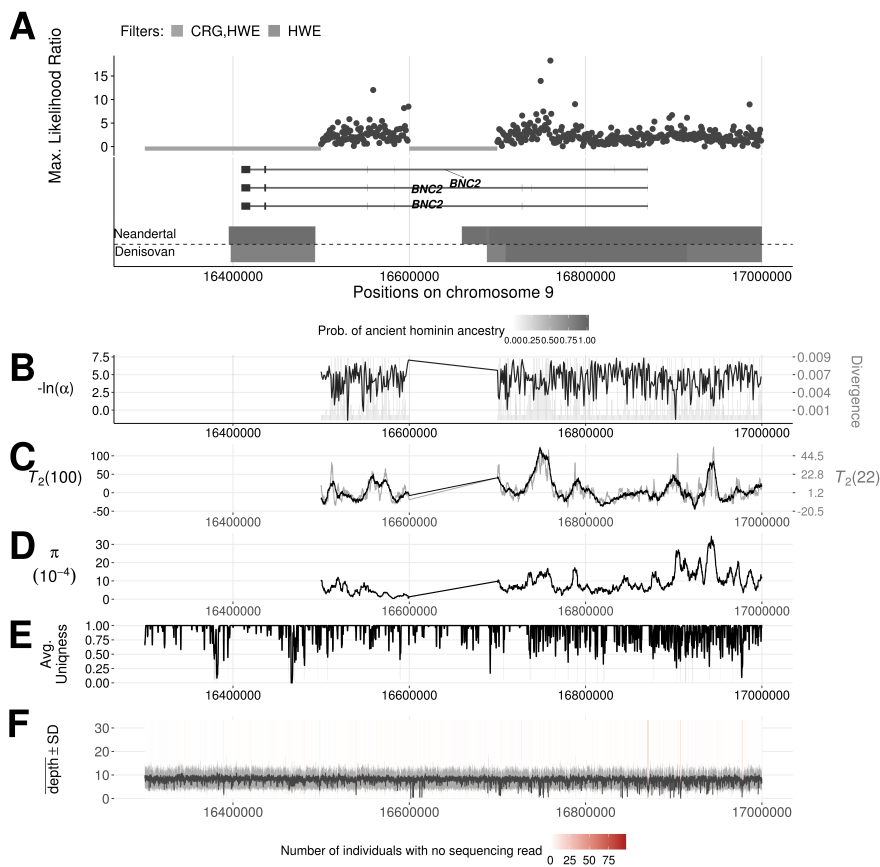

217

## References

1. Sankararaman S, Mallick S, Patterson N, Reich D. The Combined Landscape of Denisovan and Neanderthal Ancestry in Present-Day Humans. *Current biology : CB*. 2016;26:1241–1247. doi:10.1016/j.cub.2016.03.037.
